# Supplementary material for: The Butterfly Complex [{Cp*Cr(CO)3}2(μ,η1:1‐P4)] as a Versatile Ligand and Its Unexpected P1/P3 Fragmentation
Source: PubMed Central journal article supplement — Chemistry. 2020 Aug 17;26(51):11722–6. doi: 10.1002/chem.202002957 (PMC7540658; doi:10.1002/chem.202002957), 2020-08-17
Supplement: CHEM-26-11722-s001.pdf [file CHEM-26-11722-s001.pdf]

# Chemistry–A European Journal

Supporting Information

## **The Butterfly Complex $[\{\text{Cp}^*\text{Cr}(\text{CO})_3\}_2(\mu,\eta^{1:1}\text{-P}_4)]$ as a Versatile Ligand and Its Unexpected $\text{P}_1/\text{P}_3$ Fragmentation**

Rebecca Grünbauer, Gábor Balázs, and Manfred Scheer\*<sup>[a]</sup>

## SUPPORTING INFORMATION

## Table of Contents

|                                                                                                                                                                                                                                                                                                                                                                          |          |
|--------------------------------------------------------------------------------------------------------------------------------------------------------------------------------------------------------------------------------------------------------------------------------------------------------------------------------------------------------------------------|----------|
| Table of Contents .....                                                                                                                                                                                                                                                                                                                                                  | 2        |
| Experimental Procedures.....                                                                                                                                                                                                                                                                                                                                             | 3        |
| Synthesis of $[\{\text{Cp}^*\text{Cr}(\text{CO})_2\}_2(\mu_3, \eta^{3:1:1:1}\text{-P}_4)\{\text{Cr}(\text{CO})_5\}]$ (3a) .....                                                                                                                                                                                                                                          | 3        |
| Synthesis of $[\{\text{Cp}^*\text{Cr}(\text{CO})_2\}_2(\mu_4, \eta^{3:1:1:1}\text{-P}_4)\{\text{Cr}(\text{CO})_5\}_2]$ (4a) .....                                                                                                                                                                                                                                        | 3        |
| Synthesis of $[\{\text{Cp}^*\text{Cr}(\text{CO})_2\}_2(\mu_4, \eta^{3:1:1:1}\text{-P}_4)\{\text{Mo}(\text{CO})_5\}_2]$ (4b) .....                                                                                                                                                                                                                                        | 4        |
| Fragmentation of $[\{\text{Cp}^*\text{Cr}(\text{CO})_2\}_2(\mu_4, \eta^{3:1:1:1}\text{-P}_4)\{\text{Cr}(\text{CO})_5\}]$ (4a) and in situ reactivity of $[\{\text{Cp}^*\text{Cr}(\text{CO})_2\}(\mu_3\text{-P})\{\text{Cr}(\text{CO})_5\}_2]$ (6) affording $[\{\text{Cp}^*\text{Cr}(\text{tBu-NC})(\text{CO})_2\}(\mu_3\text{-P})\{\text{Cr}(\text{CO})_5\}_2]$ (7).... | 4        |
| Results and Discussion.....                                                                                                                                                                                                                                                                                                                                              | 5        |
| 1. NMR experiments.....                                                                                                                                                                                                                                                                                                                                                  | 5        |
| $[\{\text{Cp}^*\text{Cr}(\text{CO})_3\}_2(\mu_3, \eta^{1:1:1:1}\text{-P}_4)\{\text{W}(\text{CO})_4\}]$ (2) .....                                                                                                                                                                                                                                                         | 5        |
| $[\{\text{Cp}^*\text{Cr}(\text{CO})_2\}_2(\mu_3, \eta^{3:1:1:1}\text{-P}_4)\{\text{Cr}(\text{CO})_5\}]$ (3a) .....                                                                                                                                                                                                                                                       | 6        |
| $[\{\text{Cp}^*\text{Cr}(\text{CO})_2\}_2(\mu_4, \eta^{3:1:1:1}\text{-P}_4)\{\text{Cr}(\text{CO})_5\}_2]$ (4b) .....                                                                                                                                                                                                                                                     | 7        |
| Stepwise substitution from 3a to 4a.....                                                                                                                                                                                                                                                                                                                                 | 8        |
| <b>Stepwise substitution from 3b to 4b.....</b>                                                                                                                                                                                                                                                                                                                          | <b>8</b> |
| 2. DFT calculations of 4a.....                                                                                                                                                                                                                                                                                                                                           | 10       |
| 3. Crystallographic section.....                                                                                                                                                                                                                                                                                                                                         | 11       |
| $[\{\text{Cp}^*\text{Cr}(\text{CO})_3\}_2(\mu_3, \eta^{1:1:1:1}\text{-P}_4)\{\text{W}(\text{CO})_4\}]$ (2) .....                                                                                                                                                                                                                                                         | 11       |
| $[\{\text{Cp}^*\text{Cr}(\text{CO})_2\}_2(\mu_4, \eta^{3:1:1:1}\text{-P}_4)\{\text{Cr}(\text{CO})_5\}_2]$ (4a) .....                                                                                                                                                                                                                                                     | 13       |
| $[\{\text{Cp}^*\text{Cr}(\text{CO})_2\}_2(\mu_4, \eta^{3:1:1:1}\text{-P}_4)\{\text{Mo}(\text{CO})_5\}_2]$ (4b) .....                                                                                                                                                                                                                                                     | 13       |
| $[\text{Cp}^*\text{Cr}(\text{CO})_2(\eta^3\text{-P}_3)]$ (5).....                                                                                                                                                                                                                                                                                                        | 14       |
| References .....                                                                                                                                                                                                                                                                                                                                                         | 15       |

## SUPPORTING INFORMATION

## Experimental Procedures

All experiments were carried out under an atmosphere of dry argon or nitrogen using glovebox and schlenk techniques. Residues of oxygen and water were removed from the inert gas by passing it over a BASF R 3-11 (CuO/MgSiO<sub>3</sub>) catalyst, concentrated H<sub>2</sub>SO<sub>4</sub> and finally granulated silica gel. Dry solvents were collected from a Braun SPS Apparatus and degassed prior to use. The deuterated solvents C<sub>6</sub>D<sub>6</sub> and CD<sub>2</sub>Cl<sub>2</sub> were degassed and dried by stirring with Na/K alloy and CaH<sub>2</sub>, respectively, followed by distillation. After the distillation, CD<sub>2</sub>Cl<sub>2</sub> was additionally stored over molecular sieve (3 Å) which had previously been dried for four hours under high vacuum at 100 °C. [(Cp\*Cr(CO)<sub>3</sub>)<sub>2</sub>(μ,η<sup>1:1:1</sup>-P<sub>4</sub>)] (1)<sup>1</sup> and [M(CO)<sub>4</sub>(nbd)] (M = Cr, Mo, W)<sup>2</sup> were prepared according to literature procedures.

NMR spectra were recorded at the NMR department of the University Regensburg using a Bruker Avance 300 or 400 spectrometer. Samples are referenced against TMS (<sup>1</sup>H, <sup>13</sup>C) or 85% H<sub>3</sub>PO<sub>4</sub> (<sup>31</sup>P) as external standards. Chemical shifts (δ) are reported in ppm and coupling constants (J) in Hz. The spectra were processed using the TopSpin 3.0 software (Bruker) and the WIN-DAISY module of this software was used to perform simulations.<sup>3</sup>

FD and LIFDI-MS spectra were measured by the MS department of the University Regensburg on an AccuToF GCX (Jeol) spectrometer. The observed fragments were assigned according to the mass/charge (m/z) ratio and the isotope pattern.

IR spectra were recorded on an ALPHA platinum ATR spectrometer (Bruker Optik GmbH) which was placed inside a glove box. Therefore, the air-sensitive solid samples could be placed directly on the spectrometer without any additional preparative measures.

Elemental analyses were performed by the department of central analyses of the University Regensburg on a Vario micro cube instrument (Elementar Analysensysteme GmbH).

Crystallographic measurements were performed on a GV50 diffractometer with a Titan S2 detector (2, 3-1a and 4), an Oxford Diffraction Supernova diffractometer with an Atlas CCD detector (3-2a) or an Oxford Diffraction Gemini Ultra (3-2b) with an Atlas S2 detector operating at T = 123.01(13) K.<sup>4</sup> An analytical absorption correction was carried out for all measurement using the CrysAlisPro software.<sup>5</sup> The structure solution and refinement was performed using the ShelXT and ShelXL module of the Olex2 (version 1.2.7) software.<sup>6</sup> Hydrogen atoms were modeled in idealized positions and refined isotropically.

DFT calculations were performed by Dr. Gábor Balázs (University Regensburg) with the TURBOMOLE<sup>7</sup> program package at the (RI-)<sup>8</sup>BP86<sup>9</sup>/def2-TZVP<sup>6b,10</sup> level of theory. The Multipole Accelerated Resolution of Identity (MARI-J)<sup>11</sup> approach was used to speed up the geometry optimizations which were performed without any symmetry restraints. The total energies were calculated by single point calculations without using the RI formalism. The SCF energies were used without corrections and the entropic effects are not considered.

Synthesis of [(Cp\*Cr(CO)<sub>3</sub>)<sub>2</sub>(μ<sub>3</sub>,η<sup>1:1:1</sup>-P<sub>4</sub>){W(CO)<sub>4</sub>}] (2)

A dark orange solution of 1 (100 mg, 0.15 mmol, 1.0 eq.) in thf (5 mL) is added to a slightly yellow solution of [W(CO)<sub>4</sub>(nbd)] (59 mg, 0.15 mmol, 1.0 eq.) in thf (5 mL). The resulting mixture is stirred at room temperature for 3 days. Hereby, the color of the solution changes from dark orange to red. The solvent is subsequently removed under reduced pressure. The resulting red solid is washed with *n*-hexane and dried in vacuo. To obtain pure 2, *n*-pentane (15 mL) is slowly added to a concentrated solution of the crude product in dichloromethane (2 mL). Hereby, 2 precipitates as a dark red powder. Crystals suitable for single crystal X-ray analysis were obtained from a saturated solution in *n*-hexane (5 mL) and dichloromethane (1 mL) after storage at -28 °C.

## Analytical data for 2

|                                                                           |                                                                                                                  |
|---------------------------------------------------------------------------|------------------------------------------------------------------------------------------------------------------|
| <b>Yield</b>                                                              | 70 mg (0.8 mmol, 48%)                                                                                            |
| <b><sup>1</sup>H NMR</b> (C <sub>6</sub> D <sub>6</sub> )                 | δ[ppm] = 1.42 (s, 30H, C <sub>5</sub> (CH <sub>3</sub> ) <sub>5</sub> )                                          |
| <b><sup>31</sup>P NMR</b> (C <sub>6</sub> D <sub>6</sub> )                | δ[ppm] = -153.8 (m, 2P, P <sub>A</sub> ), -168.8 (m, 2P, P <sub>B</sub> )                                        |
| <b><sup>31</sup>P{<sup>1</sup>H} NMR</b> (C <sub>6</sub> D <sub>6</sub> ) | δ[ppm] = -153.8 (m, 2P, P <sub>A</sub> ), -168.8 (m, 2P, P <sub>B</sub> )                                        |
| <b>IR</b> (solid)                                                         | $\tilde{\nu}_{\text{CO}}$ [cm <sup>-1</sup> ] = 2069 (s), 2019 (s, br), 2006 (s, br), 1992 (s, br), 1988 (s, br) |
| <b>ES-MS</b> (toluene)                                                    | No reasonable peaks detectable.                                                                                  |
| <b>LIFDI-MS</b> (toluene)                                                 | No reasonable peaks detectable.                                                                                  |

Synthesis of [(Cp\*Cr(CO)<sub>2</sub>)<sub>2</sub>(μ<sub>3</sub>,η<sup>3:1:1</sup>-P<sub>4</sub>){Cr(CO)<sub>5</sub>}] (3a)

A dark orange solution of 1 (100 mg, 0.15 mmol, 1.0 eq.) in thf (5 mL) is added to a yellow solution of [Cr(CO)<sub>4</sub>(nbd)] (39 mg, 0.15 mmol, 1.0 eq.) in thf (5 mL). The resulting mixture displays a color change from orange to red while it is stirred at room temperature for 3 d. Subsequently, the solvent is removed under reduced pressure. The resulting solid is dried in vacuo and dissolved in CH<sub>2</sub>Cl<sub>2</sub> (10 mL). Upon storage at -78 °C for two weeks and subsequent storage at -28 °C for three months, a few single crystals of 3a can be obtained.

## Analytical data for (3a)

|                                                                             |                                                                                                                                                                                                                                                                                                                                                                                         |
|-----------------------------------------------------------------------------|-----------------------------------------------------------------------------------------------------------------------------------------------------------------------------------------------------------------------------------------------------------------------------------------------------------------------------------------------------------------------------------------|
| <b><sup>31</sup>P{<sup>1</sup>H} NMR</b> (CD <sub>2</sub> Cl <sub>2</sub> ) | δ[ppm] = 22.3 (dd, <sup>1</sup> J <sub>MX</sub> = 306 Hz, <sup>1</sup> J <sub>NX</sub> = 290 Hz, 1P, P <sub>X</sub> ), 166.3 (dd, <sup>1</sup> J <sub>AN</sub> = 257 Hz, <sup>1</sup> J <sub>NX</sub> = 290 Hz, 1P, P <sub>N</sub> ), 226.3 (dd, <sup>1</sup> J <sub>AM</sub> = 251 Hz, <sup>1</sup> J <sub>MX</sub> = 306 Hz, 1P, P <sub>M</sub> ), 515.4 ppm (m, 1P, P <sub>A</sub> ) |
|-----------------------------------------------------------------------------|-----------------------------------------------------------------------------------------------------------------------------------------------------------------------------------------------------------------------------------------------------------------------------------------------------------------------------------------------------------------------------------------|

Synthesis of [(Cp\*Cr(CO)<sub>2</sub>)<sub>2</sub>(μ<sub>4</sub>,η<sup>3:1:1</sup>-P<sub>4</sub>){Cr(CO)<sub>5</sub>}] (4a)

A dark orange solution of 1 (200 mg, 0.3 mmol, 1.0 eq.) in thf (5 mL) is added to a yellow solution of [Cr(CO)<sub>4</sub>(nbd)] (154 mg, 0.6 mmol, 2.0 eq.) in thf (5 mL). The resulting mixture is stirred at room temperature for 20 h. Hereby, the color of the solution darkens. The solvent is removed under reduced pressure yielding a brown-purple solid that is washed with *n*-pentane. The solid is taken up in dichloromethane (2 mL) and upon storage at -28 °C pure 4a is obtained in the form of purple crystals that are suitable for single crystal X-ray analysis.

## SUPPORTING INFORMATION

## Analytical data for 4a

|                                                                             |                                                                                                                                                                                                                                                                                                                                                                                                                                                                                                                                                                                                                                    |
|-----------------------------------------------------------------------------|------------------------------------------------------------------------------------------------------------------------------------------------------------------------------------------------------------------------------------------------------------------------------------------------------------------------------------------------------------------------------------------------------------------------------------------------------------------------------------------------------------------------------------------------------------------------------------------------------------------------------------|
| <b>Yield</b>                                                                | 184 mg (0.18 mmol, 60%)                                                                                                                                                                                                                                                                                                                                                                                                                                                                                                                                                                                                            |
| <b><sup>1</sup>H NMR</b> (CD <sub>2</sub> Cl <sub>2</sub> )                 | δ[ppm] = 1.84 (s, 15H, C <sub>5</sub> (CH <sub>3</sub> ) <sub>3</sub> ), 2.15 (s, 15H, C <sub>5</sub> (CH <sub>3</sub> ) <sub>3</sub> )                                                                                                                                                                                                                                                                                                                                                                                                                                                                                            |
| <b><sup>13</sup>C{<sup>1</sup>H} NMR</b> (CD <sub>2</sub> Cl <sub>2</sub> ) | δ[ppm] = 11.4 (s, C <sub>5</sub> (CH <sub>3</sub> ) <sub>3</sub> ), 12.0 (s, C <sub>5</sub> (CH <sub>3</sub> ) <sub>3</sub> ), 103.3 (s, C <sub>5</sub> (CH <sub>3</sub> ) <sub>3</sub> ), 105.8 (s, C <sub>5</sub> (CH <sub>3</sub> ) <sub>3</sub> ), 212.2 (s, CO), 214.7 (s, CO), 215.9 -216.1 (m, CO), 221.2 (s, CO), 221.9 (s, CO)                                                                                                                                                                                                                                                                                            |
| <b><sup>31</sup>P{<sup>1</sup>H} NMR</b> (CD <sub>2</sub> Cl <sub>2</sub> ) | δ[ppm] = 107.9 (ddd, <sup>2</sup> J <sub>AX</sub> = 28 Hz, <sup>1</sup> J <sub>MX</sub> = 300 Hz, <sup>1</sup> J <sub>NX</sub> = 330 Hz, 1P, P <sub>X</sub> ), 150.5 (ddd, <sup>2</sup> J <sub>MN</sub> = 19.5 Hz, <sup>1</sup> J <sub>AN</sub> = 252 Hz, <sup>1</sup> J <sub>NX</sub> = 330 Hz, 1P, P <sub>N</sub> ), 219.5 (ddd, <sup>2</sup> J <sub>MN</sub> = 19.5 Hz, <sup>1</sup> J <sub>AM</sub> = 254 Hz, <sup>1</sup> J <sub>MX</sub> = 300 Hz, 1P, P <sub>M</sub> ), 489.1 ppm (dt, <sup>2</sup> J <sub>AX</sub> = 28 Hz, <sup>1</sup> J <sub>AM</sub> resp. <sup>1</sup> J <sub>AN</sub> = 254 Hz, 1P, P <sub>A</sub> ) |
| <b>IR</b> (solid)                                                           | $\tilde{\nu}_{\text{CO}}$ [cm <sup>-1</sup> ] = 2069 (s), 2055 (s), 1995 (s), 1977 (m), 1921 (s, br), 1909 (s,br), 1867 (s, br)                                                                                                                                                                                                                                                                                                                                                                                                                                                                                                    |
| <b>LIFDI-MS</b> (toluene)                                                   | m/z [%] = 993.85 [M] <sup>+</sup> (100), 801.92 [M-Cr(CO) <sub>5</sub> ] <sup>+</sup> (10)                                                                                                                                                                                                                                                                                                                                                                                                                                                                                                                                         |
| <b>Elemental Analysis</b>                                                   | calcd. for C <sub>34</sub> H <sub>30</sub> Cr <sub>4</sub> O <sub>14</sub> P <sub>4</sub> ·(CH <sub>2</sub> Cl <sub>2</sub> ) (1079.42 g mol <sup>-1</sup> )<br>C 38.95, H 2.99; found C 39.09, H 3.07.                                                                                                                                                                                                                                                                                                                                                                                                                            |

Synthesis of [(Cp\*Cr(CO)<sub>2</sub>)<sub>2</sub>(μ<sub>4</sub>,η<sup>3:1:1:1</sup>-P<sub>4</sub>){Mo(CO)<sub>5</sub>]<sub>2</sub> (4b)

A dark orange solution of **1** (100 mg, 0.15 mmol, 1.0 eq.) in thf (5 mL) is added to a yellow solution of [Mo(CO)<sub>5</sub>(nbd)] (90 mg, 0.30 mmol, 2.0 eq.) in thf (5 mL). The resulting mixture is stirred at room temperature for 20 h while the color of the solution turns from orange to dark brown. The solvent is removed under reduced pressure yielding a brown solid that is washed with *n*-pentane. The solid is subsequently taken up in a mixture of dichloromethane (2 mL) and *n*-pentane (5 mL). Upon storage at -28°C pure **4b** is obtained in the form of black crystals that are suitable for single crystal X-ray analysis.

## Analytical data for 4b

|                                                                             |                                                                                                                                                                                                                                                                                              |
|-----------------------------------------------------------------------------|----------------------------------------------------------------------------------------------------------------------------------------------------------------------------------------------------------------------------------------------------------------------------------------------|
| <b>Yield</b>                                                                | 83 mg (0.76 mmol, 51 %)                                                                                                                                                                                                                                                                      |
| <b><sup>1</sup>H NMR</b> (CD <sub>2</sub> Cl <sub>2</sub> )                 | δ[ppm] = 1.84 (s, 15H, C <sub>5</sub> (CH <sub>3</sub> ) <sub>3</sub> ), 2.14 (s, 15H, C <sub>5</sub> (CH <sub>3</sub> ) <sub>3</sub> )                                                                                                                                                      |
| <b><sup>13</sup>C{<sup>1</sup>H} NMR</b> (CD <sub>2</sub> Cl <sub>2</sub> ) | δ[ppm] = 11.4 (s, C <sub>5</sub> (CH <sub>3</sub> ) <sub>3</sub> ), 12.0 (s, C <sub>5</sub> (CH <sub>3</sub> ) <sub>3</sub> ), 103.2 (s, C <sub>5</sub> (CH <sub>3</sub> ) <sub>3</sub> ), 105.4 (s, C <sub>5</sub> (CH <sub>3</sub> ) <sub>3</sub> ) (no signals for CO ligands detectable) |
| <b><sup>31</sup>P{<sup>1</sup>H} NMR</b> (CD <sub>2</sub> Cl <sub>2</sub> ) | δ[ppm] = 75.2 (m, 1P, P <sub>X</sub> ), 152.9 (m, 1P, P <sub>N</sub> ), 192.2 (m, 1P, P <sub>M</sub> ), 487.8 ppm (td, <sup>2</sup> J <sub>AX</sub> = 24 Hz, <sup>1</sup> J <sub>AM</sub> resp. <sup>1</sup> J <sub>AN</sub> = 248 Hz, 1P, P <sub>A</sub> )                                  |
| <b>IR</b> (solid)                                                           | $\tilde{\nu}_{\text{CO}}$ [cm <sup>-1</sup> ] = 2078 (m), 2067 (m), 1997 (m, br), 1979 (m, br), 1924 (s, br), 1909 (s,br), 1865 (s, br)                                                                                                                                                      |
| <b>LIFDI-MS</b> (toluene)                                                   | m/z [%] = 1081.77 [M] <sup>+</sup> (100), 847.85 [M-Mo(CO) <sub>5</sub> ] <sup>+</sup> (24)                                                                                                                                                                                                  |

Fragmentation of [(Cp\*Cr(CO)<sub>2</sub>)<sub>2</sub>(μ<sub>4</sub>,η<sup>3:1:1:1</sup>-P<sub>4</sub>){Cr(CO)<sub>5</sub>]<sub>2</sub> (4a) and in situ reactivity of [(Cp\*Cr(CO)<sub>2</sub>)(μ<sub>3</sub>-P){Cr(CO)<sub>5</sub>]<sub>2</sub> (6) affording [(Cp\*Cr(‘Bu-NC)(CO)<sub>2</sub>)(μ<sub>3</sub>-P){Cr(CO)<sub>5</sub>]<sub>2</sub> (7)

A brown solution of **4a** (20 mg, 0.02 mmol, 1.0 eq.) in thf (50 mL) is stirred at 50 °C for 3 d. Using <sup>31</sup>P{<sup>1</sup>H} NMR spectroscopy, the consumption of the starting material can be monitored and two new signals are obtained. ‘Bu-NC (1 mL, 8.8 mmol, 440 eq.) is added to the reaction solution and no color change can be observed. Again, with the help of <sup>31</sup>P{<sup>1</sup>H} NMR spectroscopy the immediate quantitative reaction of **6** to **7** is observed, while the signal for **5** stays unchanged.

## Analytical data

|                                                                                                 |                         |
|-------------------------------------------------------------------------------------------------|-------------------------|
| <b><sup>31</sup>P{<sup>1</sup>H} NMR</b> (5, thf with C <sub>6</sub> D <sub>6</sub> -capillary) | δ[ppm] = -273.3 (s, 3P) |
| <b><sup>31</sup>P{<sup>1</sup>H} NMR</b> (6, thf with C <sub>6</sub> D <sub>6</sub> -capillary) | δ[ppm] = 1123.7 (s, 1P) |
| <b><sup>31</sup>P{<sup>1</sup>H} NMR</b> (7, thf with C <sub>6</sub> D <sub>6</sub> -capillary) | δ[ppm] = -166.4 (s, 1P) |

## SUPPORTING INFORMATION

## Results and Discussion

## 1. NMR experiments

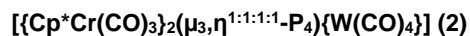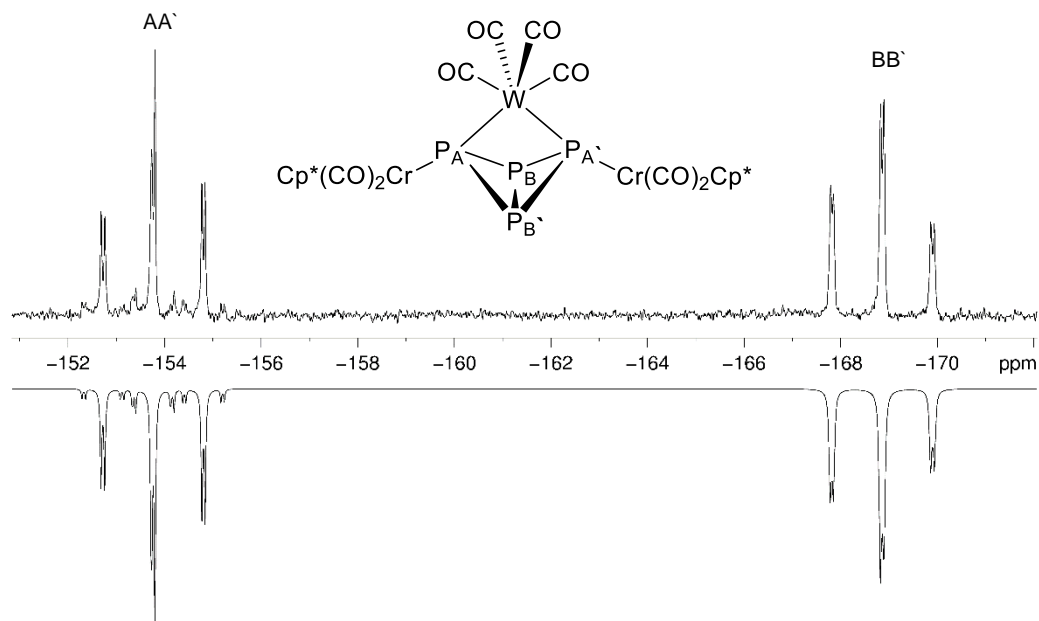

Figure S1. Experimental (top) and simulated (bottom)  $^{31}\text{P}\{^1\text{H}\}$  NMR spectrum of **2** in  $\text{C}_6\text{D}_6$ .

Table S1. Experimental and simulated values for the chemical shifts and coupling constants in the  $^{31}\text{P}\{^1\text{H}\}$  NMR spectrum of **2**.

|                      | Exp.          | F1<br>(85.69%) | F2<br>(14.28%) |                     | Exp.   | F1<br>(85.69%) | F2<br>(14.28%) |
|----------------------|---------------|----------------|----------------|---------------------|--------|----------------|----------------|
| $\delta_{\text{A}}$  | -153.8<br>ppm | -153.8<br>ppm  | -153.8<br>ppm  | $^1J_{\text{AB}}$   | 168 Hz | 169.2 Hz       | 169.4 Hz       |
|                      |               |                |                | $^1J_{\text{A'B'}}$ | 168 Hz | 169.2 Hz       | 168.7 Hz       |
| $\delta_{\text{A'}}$ | -153.8<br>ppm | -153.8<br>ppm  | -153.8<br>ppm  | $^1J_{\text{A'B}}$  | 168 Hz | 169.2 Hz       | 169.4 Hz       |
|                      |               |                |                | $^1J_{\text{A'B'}}$ | 168 Hz | 169.2 Hz       | 168.7 Hz       |
| $\delta_{\text{B}}$  | -168.8<br>ppm | -168.8<br>ppm  | -168.8<br>ppm  | $^2J_{\text{AA'}}$  | 11 Hz  | 35.0 Hz        | 35.0 Hz        |
|                      |               |                |                | $^2J_{\text{BB'}}$  | 11 Hz  | 15.4 Hz        | 18.7 Hz        |
| $\delta_{\text{B'}}$ | -168.8<br>ppm | -168.8<br>ppm  | -168.8<br>ppm  | $^1J_{\text{AW}}$   | -      | -              | 128.3 Hz       |
|                      |               |                |                | $^1J_{\text{A'W}}$  | -      | -              | 129.0 Hz       |
|                      |               |                |                | $^2J_{\text{BW}}$   | -      | -              | 9.8 Hz         |
|                      |               |                |                | $^2J_{\text{B'W}}$  | -      | -              | 9.8 Hz         |

The simulation of the  $^{31}\text{P}\{^1\text{H}\}$  NMR spectrum of **2** was carried out on the basis of an AA' BB' spin system with a  $\text{C}_1$  symmetry. According to the natural abundance of the NMR active  $^{138}\text{W}$  isotope, the simulation was performed using two fragments. The main fragment (F1, 85.69%) was simulated with an NMR inactive tungsten atom, whereas the second fragment (F2, 14.28%) considered the  $^{138}\text{W}$  atom.

## SUPPORTING INFORMATION

 $[\{\text{Cp}^*\text{Cr}(\text{CO})_2\}_2(\mu_3, \eta^{3:1:1}\text{-P}_4)\{\text{Cr}(\text{CO})_5\}]$  (**3a**)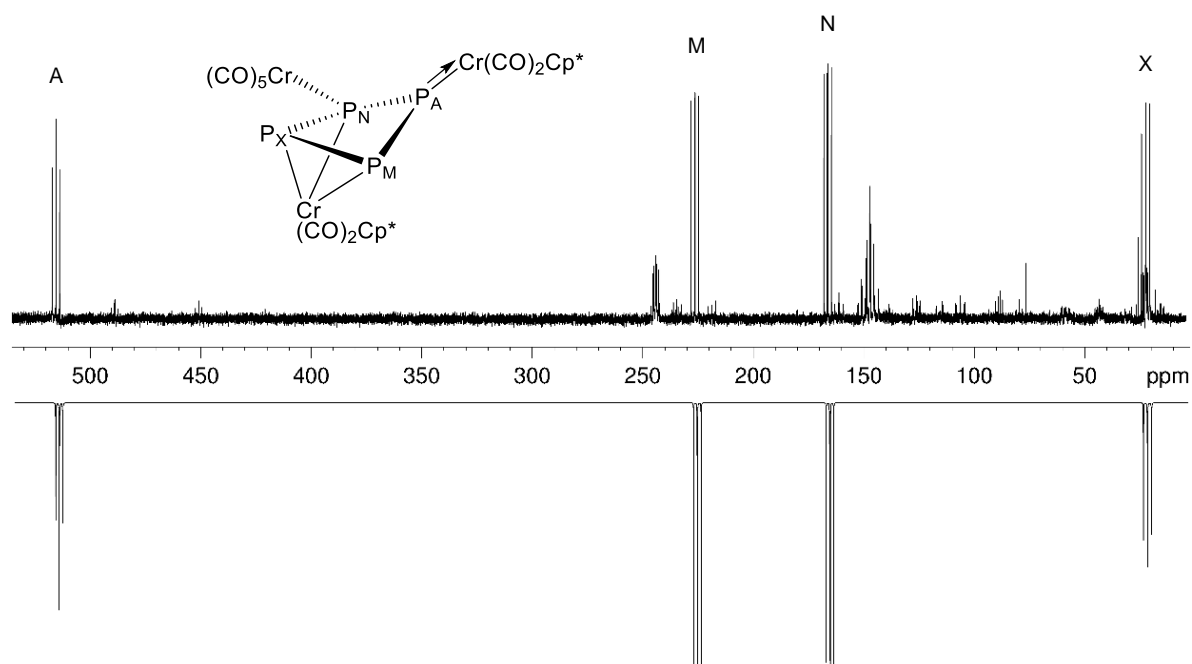

**Figure S2.** Experimental  $^{31}\text{P}\{^1\text{H}\}$  NMR spectrum of the reaction of **1** with 1.0 eq.  $[\text{Cr}(\text{CO})_4(\text{nbd})]$  in  $\text{CD}_2\text{Cl}_2$  (top) and simulated  $^{31}\text{P}\{^1\text{H}\}$  NMR spectrum of **3a** (bottom).

 $[\{\text{Cp}^*\text{Cr}(\text{CO})_2\}_2(\mu_4, \eta^{3:1:1:1}\text{-P}_4)\{\text{Cr}(\text{CO})_5\}_2]$  (**4a**)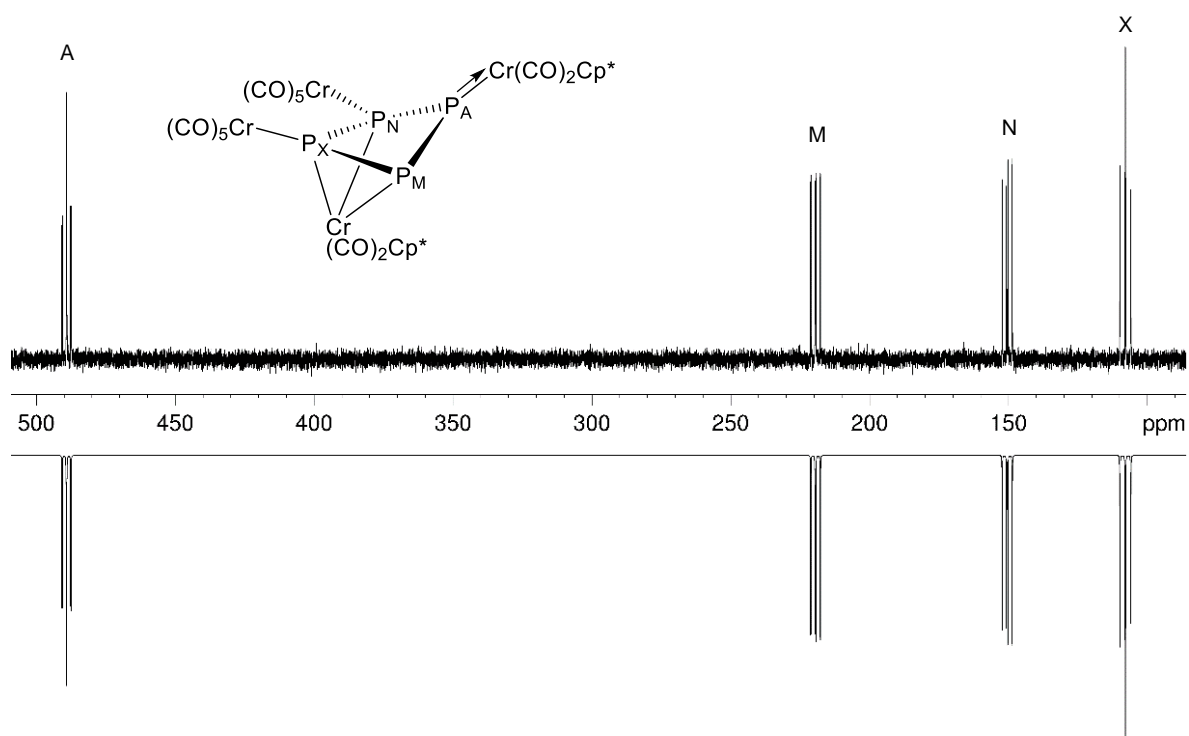

**Figure S3.** Experimental (top) and simulated (bottom)  $^{31}\text{P}\{^1\text{H}\}$  NMR spectrum of **4a** in  $\text{CD}_2\text{Cl}_2$ .

## SUPPORTING INFORMATION

[[Cp\*Cr(CO)<sub>2</sub>]<sub>2</sub>(μ<sub>4</sub>,η<sup>3:1:1:1</sup>-P<sub>4</sub>){Cr(CO)<sub>5</sub>]<sub>2</sub>] (4b)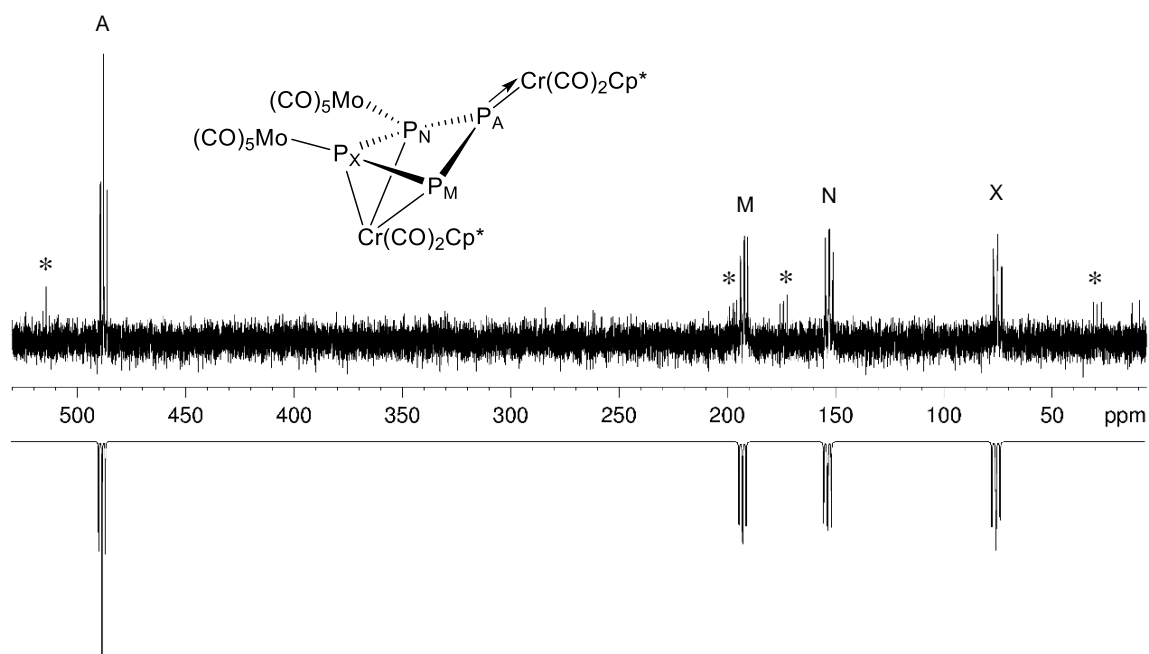

**Figure S4.** Experimental (top) and simulated (bottom) <sup>31</sup>P{<sup>1</sup>H} NMR spectrum of **4b** in CD<sub>2</sub>Cl<sub>2</sub> (Signals marked with \* can be attributed to **3b** as a result of decomposition).

**Table S2.** Experimental and simulated values for the chemical shifts and coupling constants in the <sup>31</sup>P{<sup>1</sup>H} NMR spectrum of **3a**, **4a** and **4b**.

|           | experimental values |           |            |        | simulated values <sup>[1]</sup> |           |            |          |
|-----------|---------------------|-----------|------------|--------|---------------------------------|-----------|------------|----------|
| <b>3a</b> | $\delta_A$          | 515.4 ppm | $^1J_{AM}$ | 251 Hz | $\delta_A$                      | 515.4 ppm | $^1J_{AM}$ | 249.3 Hz |
|           | $\delta_M$          | 226.3 ppm | $^1J_{AN}$ | 257 Hz | $\delta_M$                      | 226.3 ppm | $^1J_{AN}$ | 258.5 Hz |
|           | $\delta_N$          | 166.3 ppm | $^2J_{AX}$ | -      | $\delta_N$                      | 166.2 ppm | $^2J_{AX}$ | 6.8 Hz   |
|           | $\delta_X$          | 22.3 ppm  | $^2J_{MN}$ | -      | $\delta_X$                      | 22.3 ppm  | $^2J_{MN}$ | 1.1 Hz   |
|           |                     |           | $^1J_{MX}$ | 306 Hz |                                 |           | $^1J_{MX}$ | 306.2 Hz |
|           |                     |           | $^1J_{NX}$ | 290 Hz |                                 |           | $^1J_{NX}$ | 291.0 Hz |
| <b>4a</b> | $\delta_A$          | 489.1 ppm | $^1J_{AM}$ | 254 Hz | $\delta_A$                      | 489.1 ppm | $^1J_{AM}$ | 256.0 Hz |
|           | $\delta_M$          | 219.5 ppm | $^1J_{AN}$ | 252 Hz | $\delta_M$                      | 219.6 ppm | $^1J_{AN}$ | 251.3 Hz |
|           | $\delta_N$          | 150.5 ppm | $^2J_{AX}$ | 28 Hz  | $\delta_N$                      | 150.4 ppm | $^2J_{AX}$ | 26.9 Hz  |
|           | $\delta_X$          | 107.9 ppm | $^2J_{MN}$ | 20 Hz  | $\delta_X$                      | 108.0 ppm | $^2J_{MN}$ | 19.2 Hz  |
|           |                     |           | $^1J_{MX}$ | 300 Hz |                                 |           | $^1J_{MX}$ | 230.0 Hz |
|           |                     |           | $^1J_{NX}$ | 330 Hz |                                 |           | $^1J_{NX}$ | 330.3 Hz |
| <b>4b</b> | $\delta_A$          | 487.8 ppm | $^1J_{AM}$ | -      | $\delta_A$                      | 487.8 ppm | $^1J_{AM}$ | 247.3 Hz |
|           | $\delta_M$          | 192.2 ppm | $^1J_{AN}$ | 248 Hz | $\delta_M$                      | 192.1 ppm | $^1J_{AN}$ | 249.6 Hz |
|           | $\delta_N$          | 152.9 ppm | $^2J_{AX}$ | 24 Hz  | $\delta_N$                      | 152.9 ppm | $^2J_{AX}$ | 22.6 Hz  |
|           | $\delta_X$          | 75.2 ppm  | $^2J_{MN}$ | -      | $\delta_X$                      | 75.2 ppm  | $^2J_{MN}$ | 20.8 Hz  |
|           |                     |           | $^1J_{MX}$ | -      |                                 |           | $^1J_{MX}$ | 286.9 Hz |
|           |                     |           | $^1J_{NX}$ | -      |                                 |           | $^1J_{NX}$ | 324.0 Hz |

<sup>[1]</sup> based on an AMNX spin system with a C<sub>1</sub> symmetry.

## SUPPORTING INFORMATION

## Stepwise substitution from 3a to 4a

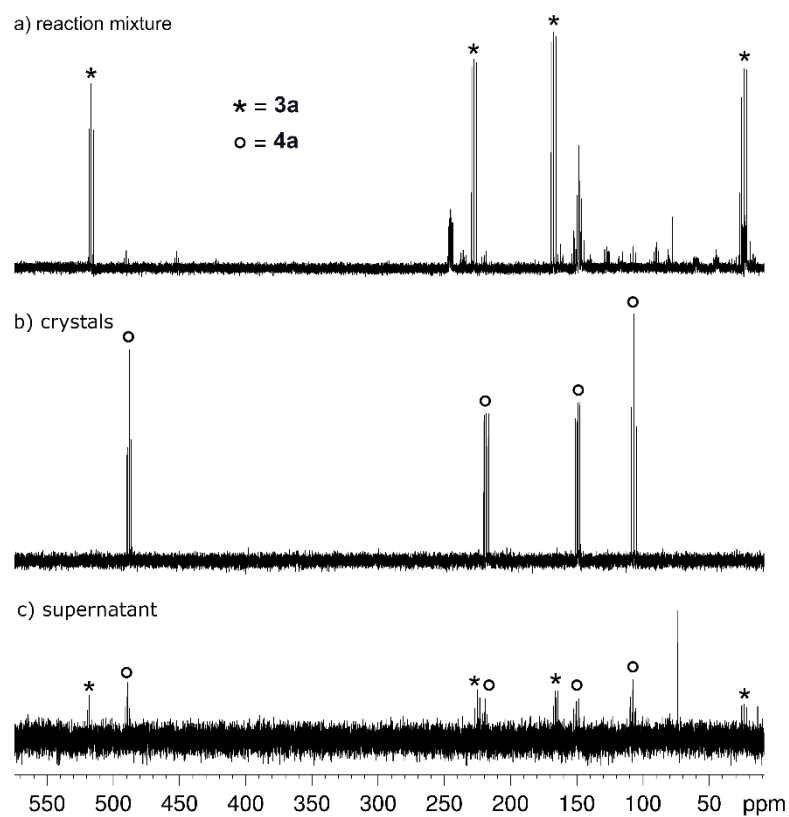

**Figure S5:**  $^{31}\text{P}\{^1\text{H}\}$  NMR spectra of the reaction of **1** with 1.0 eq.  $[\text{Cr}(\text{CO})_4(\text{nbd})]$ : (a) reactions solution (b) dissolved crystals obtained from the reaction solution (c) supernatant of the obtained crystals.



## SUPPORTING INFORMATION

Stepwise substitution from **3b** to **4b**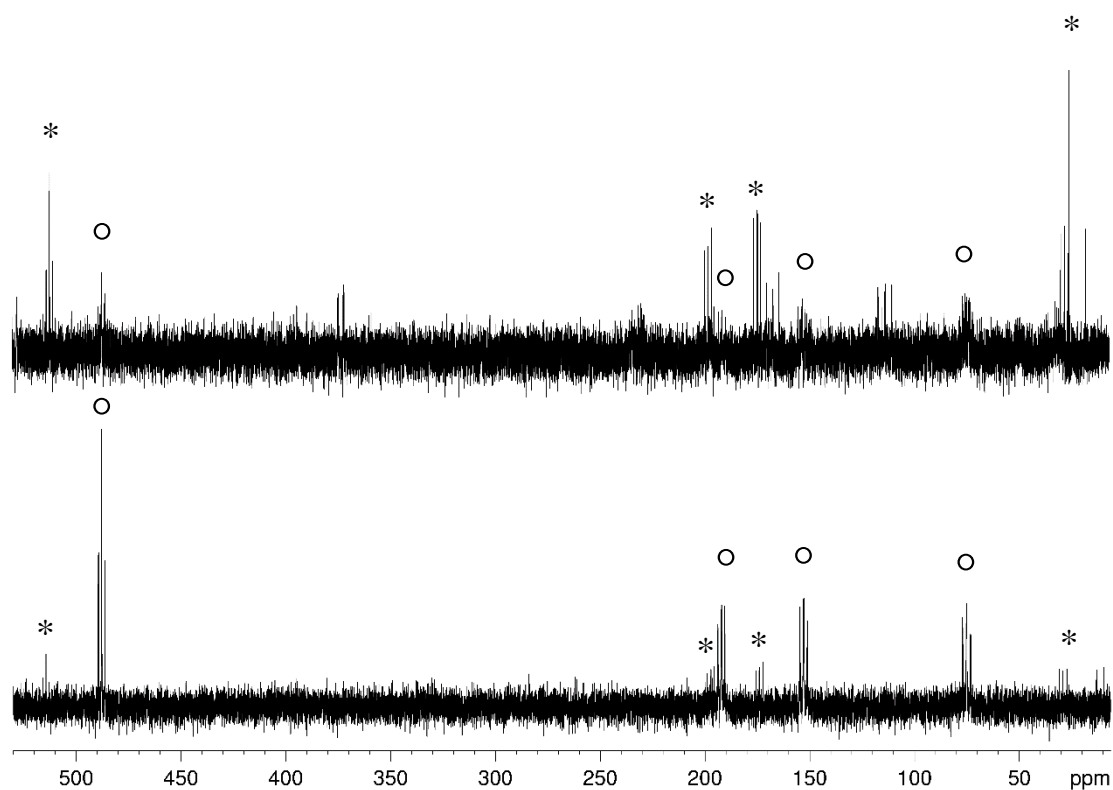

**Figure S6.**  $^{31}\text{P}\{^1\text{H}\}$  NMR spectrum (in  $\text{CD}_2\text{Cl}_2$ ) of the reaction solution (top) and the isolated crystals (bottom) from the reaction of **1** with 1.0 eq.  $[\text{Mo}(\text{CO})_4(\text{nbd})]$ . Signals marked with \* can be attributed to **3b** and signals marked with ° belong to **4b**, respectively.

As discussed for **3a** the mono-substituted **3b** is the main species in the reaction solution when reacting **1** with 1.0 eq.  $[\text{Mo}(\text{CO})_4(\text{nbd})]$ . When storing the solution at  $-28\text{ }^\circ\text{C}$  during the crystallization process, a second substitution occurs giving **4b** as the exclusive crystallization product. However, if the crystals are dissolved in  $\text{CD}_2\text{Cl}_2$  a small amount of **4b** decomposes to give **3b** as a side product.

## SUPPORTING INFORMATION

## 2. DFT calculations of 4a

In order to elucidate the electronic structure of **4a**, DFT calculations at the BP86/def2-TZVP level were performed and the geometric parameters of the optimized geometry of **4a** are in good agreement with those determined by single crystal X-ray diffraction. According to the calculations, the short Cr1–P1 distance (labeling according to Figure 3) represents a double bond, as it is attributed a Wiberg Bond Index (WBI) of 1.43. Consequently, the additional coordination of electron density from the P1 lone pair towards Cr1 balancing the electron deficit caused by decarbonylation is confirmed. The WBIs of the Cr2–P bonds vary from 0.60 to 0.78, while the WBIs for the Cr3–P3 and Cr4–P4 bonds are both 0.71. The NPA charges (Natural Population Analysis) show a negative charge accumulation on the Cr atoms (Cr1: -0.91, Cr2: -1.15, Cr3: -1.61, Cr4: -1.61), while the P<sub>4</sub> unit is rather positively charged (P1: 0.34, P2: 0.10, P3: 0.31, P4: 0.41), which reflects the donating ability of the P<sub>4</sub> unit. Additionally, the calculated HOMO and HOMO-1 of **4a** represent the d-orbitals of the Cr1 atom, while the HOMO-2 and the HOMO-4 contain contributions from the Cr1–P1 multiple bond and the double bond nature of the Cr1–P1 bond is also shown by the localized molecular orbitals.

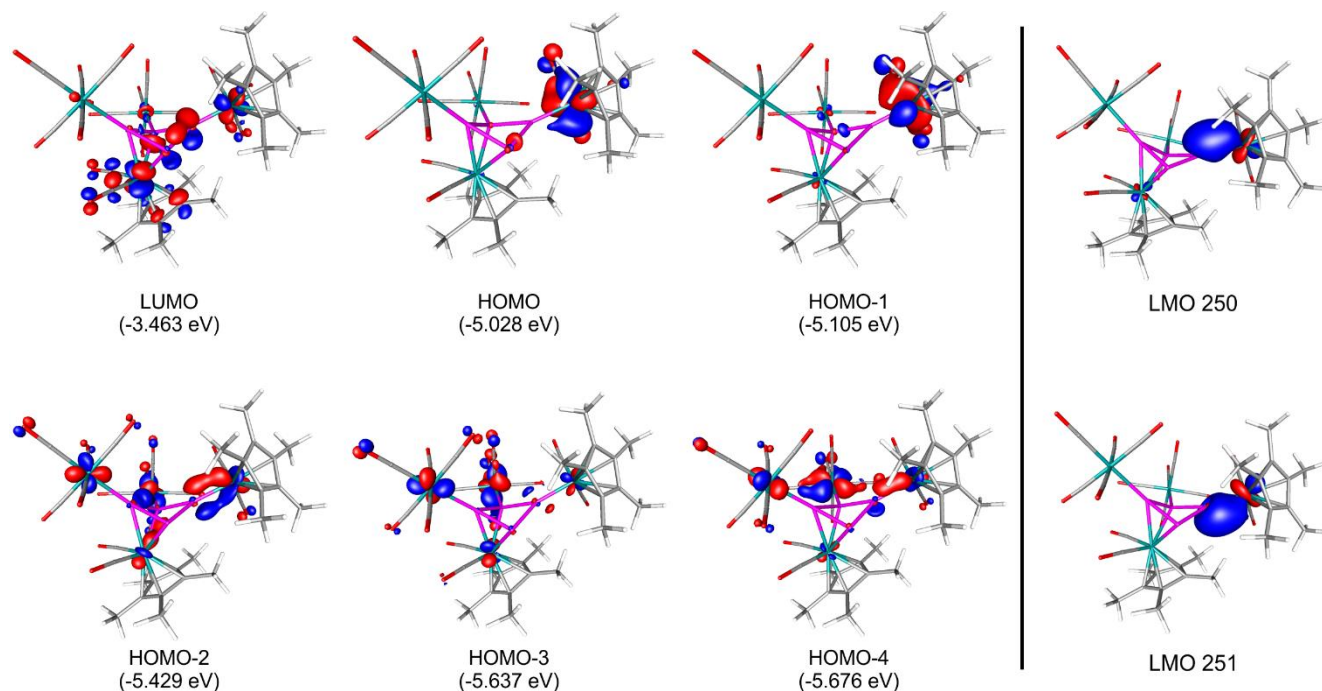

**Figure S7.** Left: Frontier molecular orbitals of **4a**, calculated at the BP86/def2-TZVP level of theory; right: Localized molecular orbitals representing the Cr1–P1 multiple bond in **4a**

## SUPPORTING INFORMATION

## 3. Crystallographic section

The crystals were selected and mounted on a GV50 diffractometer equipped with a TitanS2 detector. All crystals were kept at  $T = 123(1)$  K during data collection. Data collection and reduction were performed with CrysAlisPro version 1.171.40.14a.<sup>[12]</sup> For all compounds a numerical absorption correction based on gaussian integration over a multifaceted crystal model and an empirical absorption correction using spherical harmonics, implemented in SCALE3 ABSPACK scaling algorithm was applied. Using Olex2,<sup>[13]</sup> all structures were solved by ShelXT<sup>[14]</sup> and a least-square refinement on  $F^2$  was carried out with ShelXL.<sup>[15]</sup> All non-hydrogen atoms were refined anisotropically. Hydrogen atoms at the carbon atoms were located in idealized positions and refined isotropically according to the riding model.

CCDC-2009816 (**2**), CCDC-2009704 (**3a**), CCDC-2009705 (**4a**), CCDC-2009706 (**4b**) and CCDC-2009707 (**5**), contain the supplementary crystallographic data for this paper. These data can be obtained free of charge at [www.ccdc.cam.ac.uk/contents/retrieving.html](http://www.ccdc.cam.ac.uk/contents/retrieving.html) (or from the Cambridge Crystallographic Data Centre, 12 Union Road, Cambridge CB2 1EZ, UK; Fax: +44-1223-336-033; e-mail: deposit@ccdc.com.ac.uk).

**Table 3:** overview of selected crystallographic parameters of the single crystal X-ray diffraction experiments performed for **2**, **3a**, **4a**, **4b** and **5**.

|                                                   | <b>2</b>                                                                         | <b>3a</b>                                                                                     | <b>4a</b>                                                                                      | <b>4b</b>                                                                                                      | <b>5</b>                                                        |
|---------------------------------------------------|----------------------------------------------------------------------------------|-----------------------------------------------------------------------------------------------|------------------------------------------------------------------------------------------------|----------------------------------------------------------------------------------------------------------------|-----------------------------------------------------------------|
| <b>Formula</b>                                    | C <sub>30</sub> H <sub>30</sub> Cr <sub>2</sub> O <sub>10</sub> P <sub>4</sub> W | C <sub>30</sub> H <sub>32</sub> Cl <sub>2</sub> Cr <sub>3</sub> O <sub>9</sub> P <sub>4</sub> | C <sub>35</sub> H <sub>32</sub> Cl <sub>2</sub> Cr <sub>4</sub> O <sub>14</sub> P <sub>4</sub> | C <sub>35</sub> H <sub>32</sub> Cl <sub>2</sub> Cr <sub>2</sub> Mo <sub>2</sub> O <sub>14</sub> P <sub>4</sub> | C <sub>12</sub> H <sub>15</sub> CrO <sub>2</sub> P <sub>3</sub> |
| <b><i>D</i><sub>calc</sub>/ g cm<sup>-3</sup></b> | 1.790                                                                            | 1.583                                                                                         | 1.639                                                                                          | 1.721                                                                                                          | 1.582                                                           |
| <b><i>m</i>/mm<sup>-1</sup></b>                   | 12.906                                                                           | 10.458                                                                                        | 11.028                                                                                         | 11.297                                                                                                         | 9.816                                                           |
| <b>Formula Weight</b>                             | 962.27                                                                           | 887.33                                                                                        | 1079.38                                                                                        | 1167.26                                                                                                        | 336.15                                                          |
| <b>Colour</b>                                     | dark brown                                                                       | dark orange                                                                                   | dark orange                                                                                    | dark green                                                                                                     | light orange                                                    |
| <b>Shape</b>                                      | block                                                                            | plate                                                                                         | plate                                                                                          | plate                                                                                                          | block                                                           |
| <b>Size/mm<sup>3</sup></b>                        | 0.10x0.10x0.07                                                                   | 0.15x0.12x0.04                                                                                | 0.11x0.09x0.02                                                                                 | 0.36x0.20x0.04                                                                                                 | 0.08x0.06x0.05                                                  |
| <b><i>T</i>/K</b>                                 | 123.01(13)                                                                       | 123.01(10)                                                                                    | 123.00(10)                                                                                     | 123.0                                                                                                          | 123.01(10)                                                      |
| <b>Crystal System</b>                             | tetragonal                                                                       | monoclinic                                                                                    | triclinic                                                                                      | triclinic                                                                                                      | orthorhombic                                                    |
| <b>Flack Parameter</b>                            | -0.007(8)                                                                        | -                                                                                             | -                                                                                              | -                                                                                                              | -                                                               |
| <b>Hoof Parameter</b>                             | -0.008(6)                                                                        | -                                                                                             | -                                                                                              | -                                                                                                              | -                                                               |
| <b>Space Group</b>                                | $I\bar{4}$                                                                       | $P2_1/c$                                                                                      | $P\bar{1}$                                                                                     | $P\bar{1}$                                                                                                     | $Pnma$                                                          |
| <b><i>a</i>/Å</b>                                 | 19.1084(4)                                                                       | 8.61978(12)                                                                                   | 11.0293(5)                                                                                     | 11.1540(3)                                                                                                     | 8.3549(2)                                                       |
| <b><i>b</i>/Å</b>                                 | 19.1084(4)                                                                       | 21.5601(3)                                                                                    | 11.2147(5)                                                                                     | 11.2534(3)                                                                                                     | 12.7888(3)                                                      |
| <b><i>c</i>/Å</b>                                 | 19.5531(6)                                                                       | 20.3044(2)                                                                                    | 19.6309(7)                                                                                     | 19.9843(5)                                                                                                     | 13.2096(2)                                                      |
| <b><i>a</i>'</b>                                  | 90                                                                               | 90                                                                                            | 83.486(4)                                                                                      | 83.065(2)                                                                                                      | 90                                                              |
| <b><i>β</i>'</b>                                  | 90                                                                               | 99.3350(13)                                                                                   | 89.878(3)                                                                                      | 89.507(2)                                                                                                      | 90                                                              |
| <b><i>γ</i>'</b>                                  | 90                                                                               | 90                                                                                            | 65.220(5)                                                                                      | 64.897(2)                                                                                                      | 90                                                              |
| <b><i>V</i>/Å<sup>3</sup></b>                     | 7139.4(4)                                                                        | 3723.47(9)                                                                                    | 2187.57(18)                                                                                    | 2252.35(10)                                                                                                    | 1411.44(6)                                                      |
| <b><i>Z</i>'</b>                                  | 8                                                                                | 4                                                                                             | 2                                                                                              | 2                                                                                                              | 4                                                               |
| <b><i>Z</i></b>                                   | 1                                                                                | 1                                                                                             | 1                                                                                              | 1                                                                                                              | 0.5                                                             |
| <b>Wavelength/Å</b>                               | 1.54184                                                                          | 1.54184                                                                                       | 1.54184                                                                                        | 1.54184                                                                                                        | 1.54184                                                         |
| <b>Radiation type</b>                             | Cu K $_{\alpha}$                                                                 | Cu K $_{\alpha}$                                                                              | Cu K $_{\alpha}$                                                                               | Cu K $_{\alpha}$                                                                                               | Cu K $_{\alpha}$                                                |
| <b><i>Q</i><sub>min</sub>'</b>                    | 3.234                                                                            | 4.101                                                                                         | 4.376                                                                                          | 4.375                                                                                                          | 4.813                                                           |
| <b><i>Q</i><sub>max</sub>'</b>                    | 74.141                                                                           | 74.213                                                                                        | 74.174                                                                                         | 66.404                                                                                                         | 79.927                                                          |
| <b>Measured Refl's.</b>                           | 18647                                                                            | 21477                                                                                         | 18305                                                                                          | 23984                                                                                                          | 7393                                                            |
| <b>Ind't Refl's</b>                               | 6396                                                                             | 7429                                                                                          | 8439                                                                                           | 7857                                                                                                           | 1448                                                            |
| <b>Refl's with <i>I</i> &gt; 2(<i>I</i>)</b>      | 5883                                                                             | 6622                                                                                          | 6231                                                                                           | 7480                                                                                                           | 1397                                                            |
| <b><i>R</i><sub>int</sub></b>                     | 0.0577                                                                           | 0.0315                                                                                        | 0.0584                                                                                         | 0.0375                                                                                                         | 0.0245                                                          |
| <b>Parameters</b>                                 | 434                                                                              | 633                                                                                           | 561                                                                                            | 569                                                                                                            | 119                                                             |
| <b>Restraints</b>                                 | 0                                                                                | 520                                                                                           | 18                                                                                             | 66                                                                                                             | 0                                                               |
| <b>Largest Peak</b>                               | 2.722                                                                            | 0.700                                                                                         | 0.725                                                                                          | 1.271                                                                                                          | 0.324                                                           |
| <b>Deepest Hole</b>                               | -1.883                                                                           | -0.599                                                                                        | -0.627                                                                                         | -1.371                                                                                                         | -0.370                                                          |
| <b>Goof</b>                                       | 1.082                                                                            | 1.026                                                                                         | 1.018                                                                                          | 1.036                                                                                                          | 1.083                                                           |
| <b><i>wR</i><sub>2</sub> (all data)</b>           | 0.1235                                                                           | 0.0760                                                                                        | 0.1252                                                                                         | 0.1235                                                                                                         | 0.0618                                                          |
| <b><i>wR</i><sub>2</sub></b>                      | 0.1192                                                                           | 0.0728                                                                                        | 0.1103                                                                                         | 0.1215                                                                                                         | 0.0600                                                          |
| <b><i>R</i><sub>1</sub> (all data)</b>            | 0.0542                                                                           | 0.0353                                                                                        | 0.0750                                                                                         | 0.0449                                                                                                         | 0.0243                                                          |
| <b><i>R</i><sub>1</sub></b>                       | 0.0483                                                                           | 0.0298                                                                                        | 0.0484                                                                                         | 0.0433                                                                                                         | 0.0230                                                          |

**[[Cp\*Cr(CO)<sub>3</sub>]<sub>2</sub>(μ<sub>3</sub>,η<sup>1:1:1</sup>-P<sub>4</sub>){W(CO)<sub>4</sub>}] (**2**)**

Compound **2** crystallizes in the form of dark brown blocks from a saturated solution in hexane/CH<sub>2</sub>Cl<sub>2</sub> upon storage at -28°C. A suitable crystal with dimensions 0.10 × 0.10 × 0.07 mm<sup>3</sup> was selected and mounted on a GV50, TitanS2 diffractometer. The crystal was kept at a steady  $T = 123.01(13)$  K during data collection. The structure was solved with the ShelXT (Sheldrick, 2015) solution program using dual methods. The model was refined with ShelXL 2018/3 (Sheldrick, 2015) using full matrix least squares minimization on  $F^2$ . The asymmetric unit contains one molecule of **2**.

## SUPPORTING INFORMATION

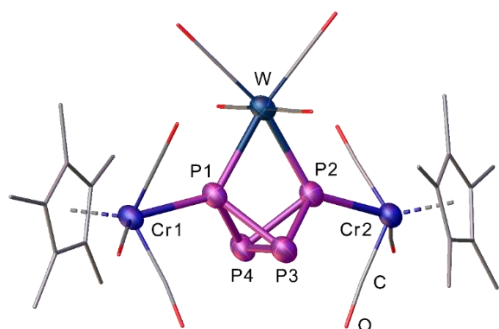

**Figure S8.** Molecular structure of **2** in the solid state; for clarity H atoms are omitted and the Cp\* as well as CO ligands are drawn in the wire frame model; thermal ellipsoids drawn at 50% probability level.

**Table S4:** Selected bond lengths [Å] and angles [°] of **2**

|               | d / Å    |                 | $\alpha$ / ° |
|---------------|----------|-----------------|--------------|
| <b>Cr1–P1</b> | 2.449(4) | <b>P1–W–P2</b>  | 64.21(11)    |
| <b>Cr2–P2</b> | 2.445(4) | <b>P1–P3–P2</b> | 76.21(17)    |
| <b>W–P1</b>   | 2.583(4) | <b>P1–P4–P2</b> | 76.51(17)    |
| <b>W–P2</b>   | 2.582(3) | <b>P3–P1–P4</b> | 59.49(17)    |
| <b>P1–P3</b>  | 2.214(5) | <b>P3–P2–P4</b> | 59.38(17)    |
| <b>P1–P4</b>  | 2.224(5) | <b>P2–P4–P3</b> | 60.86(17)    |
| <b>P2–P3</b>  | 2.235(5) | <b>P1–P4–P3</b> | 60.03(16)    |
| <b>P2–P4</b>  | 2.210(5) | <b>P2–P3–P4</b> | 59.75(16)    |
| <b>P1··P2</b> | 2.74(5)  | <b>P1–P3–P4</b> | 60.48(16)    |
| <b>P3–P4</b>  | 2.202(6) |                 |              |

## SUPPORTING INFORMATION

**[[Cp\*Cr(CO)<sub>2</sub>]<sub>2</sub>(μ<sub>3</sub>,η<sup>3:1:1</sup>-P<sub>4</sub>){Cr(CO)<sub>5</sub>}] (3a)**

Compound **3a** crystallizes in the form of dark orange plates from a reaction solution of **1** with 1.0 eq. [Cr(CO)<sub>5</sub>(nbd)]. The reaction solution is stored at -78°C for one week and subsequently held at -28°C for three months. A suitable crystal with dimensions 0.15 × 0.12 × 0.04 mm<sup>3</sup> was selected and mounted on a GV50, TitanS2 diffractometer. The crystal was kept at a steady  $T = 123.01(10)$  K during data collection. The structure was solved with the ShelXT (Sheldrick, 2015) solution program using dual methods. The model was refined with ShelXL 2018/3 (Sheldrick, 2015) using full matrix least squares minimization on  $F^2$ . The asymmetric unit contains one molecule of Compound **3a** (displaying a highly disordered Cp\* ligand) and one CH<sub>2</sub>Cl<sub>2</sub> molecule.

**[[Cp\*Cr(CO)<sub>2</sub>]<sub>2</sub>(μ<sub>4</sub>,η<sup>3:1:1:1</sup>-P<sub>4</sub>){Cr(CO)<sub>5</sub>]<sub>2</sub>] (4a)**

Compound **4a** crystallizes in the form of dark orange plates from a saturated solution in CH<sub>2</sub>Cl<sub>2</sub> upon storage at -28°C. A suitable crystal with dimensions 0.11 × 0.09 × 0.02 mm<sup>3</sup> was selected and mounted on a SuperNova, Single source at offset/far, Atlas diffractometer. The crystal was kept at a steady  $T = 123.00(10)$  K during data collection. The structure was solved with the ShelXT (Sheldrick, 2015) solution program using dual methods. The model was refined with ShelXL 2018/3 (Sheldrick, 2015) using full matrix least squares minimisation on  $F^2$ . The asymmetric unit contains one molecule of **4a** as well as one disordered solvent molecule.

**[[Cp\*Cr(CO)<sub>2</sub>]<sub>2</sub>(μ<sub>4</sub>,η<sup>3:1:1:1</sup>-P<sub>4</sub>){Mo(CO)<sub>5</sub>]<sub>2</sub>] (4b)**

Compound **4b** crystallizes in the form of dark green plates from a saturated solution in CH<sub>2</sub>Cl<sub>2</sub>/*n*-pentane upon storage at -28°C. A suitable crystal with dimensions 0.36 × 0.20 × 0.04 mm<sup>3</sup> was selected and mounted on a Xcalibur, AtlasS2, Gemini ultra diffractometer. The crystal was kept at a steady  $T = 123.0$  K during data collection. The structure was solved with the ShelXT (Sheldrick, 2015) solution program using dual. The model was refined with ShelXL 2018/3 (Sheldrick, 2015) using full matrix least squares minimisation on  $F^2$ . The asymmetric unit contains one molecule of **4b** as well as one disordered solvent molecule.

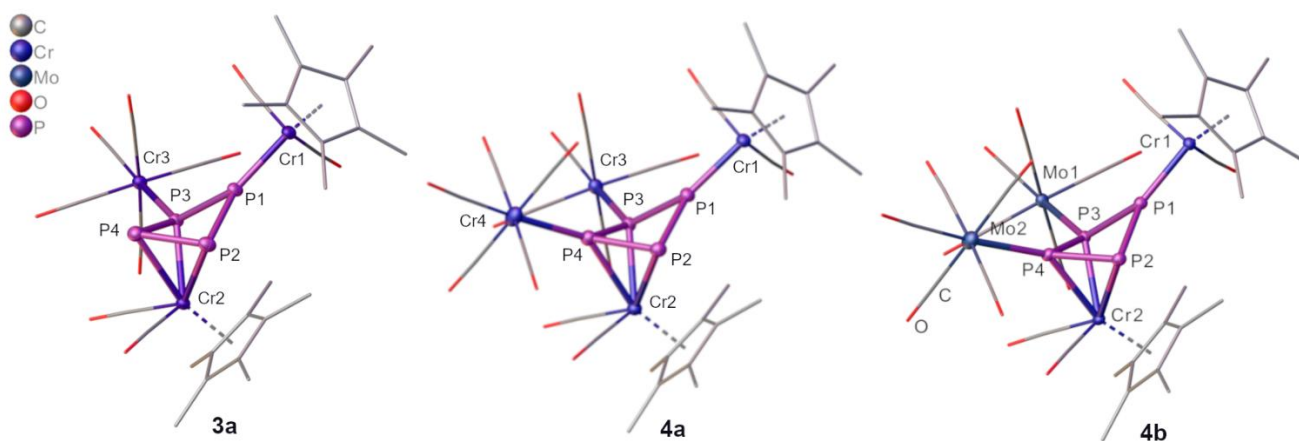

**Figure S9.** Molecular structure of Compound **3a**, **4a** and **4b** in the solid state; for clarity H atoms and solvent molecules are omitted, Cp\* and CO ligands are drawn in the wire frame model and only position of disordered Cp\* ligand is displayed; thermal ellipsoids drawn at 50% probability level

## SUPPORTING INFORMATION

**Table S5:** Selected bond lengths [Å] and angles [°] of **3a**, **4a** and **4b**.

|              |                                                              | <b>3a</b> | <b>4a</b>  | <b>4b</b>  |
|--------------|--------------------------------------------------------------|-----------|------------|------------|
| <i>d</i> / Å | <b>Cr1–P1</b>                                                | 2.1258(6) | 2.1129(11) | 2.1169(11) |
|              | <b>Cr2–P2</b>                                                | 2.4774(6) | 2.4926(12) | 2.4970(11) |
|              | <b>Cr2–P3</b>                                                | 2.4451(5) | 2.4778(11) | 2.4726(11) |
|              | <b>Cr2–P4</b>                                                | 2.4512(6) | 2.4428(11) | 2.4354(11) |
|              | <b>Cr3–P3 / Mo1–P3</b>                                       | 2.3664(5) | 2.3564(12) | 2.5002(9)  |
|              | <b>Cr4–P4 / Mo2–P4</b>                                       | -         | 2.3517(11) | 2.4896(10) |
|              | <b>P1–P2</b>                                                 | 2.2181(7) | 2.2265(13) | 2.2259(13) |
|              | <b>P1–P3</b>                                                 | 2.1973(7) | 2.2013(14) | 2.1938(13) |
|              | <b>P3–P4</b>                                                 | 2.1705(7) | 2.1583(12) | 2.1560(13) |
|              | <b>P2–P4</b>                                                 | 2.1606(7) | 2.1390(15) | 2.1427(13) |
| <i>α</i> / ° | <b>Cr1–P1–P2</b>                                             | 137.83(3) | 138.98(6)  | 139.54(5)  |
|              | <b>Cr1–P1–P3</b>                                             | 139.04(3) | 137.30(6)  | 136.42(5)  |
|              | <b>P2–P1–P3</b>                                              | 82.99(2)  | 83.72(5)   | 84.02(5)   |
|              | <b>P1–P2–P4</b>                                              | 86.79(2)  | 85.88(5)   | 85.66(5)   |
|              | <b>P1–P3–P4</b>                                              | 87.07(2)  | 86.04(5)   | 86.14(5)   |
|              | <b>P2–P4–P3</b>                                              | 84.98(3)  | 86.88(5)   | 86.96(5)   |
|              | <b>Plane<sub>P1–P2–P3</sub> vs. Plane<sub>P2–P3–P4</sub></b> | 135.50(8) | 135.92(6)  | 136.18(8)  |

**[Cp\*Cr(CO)<sub>2</sub>(η<sup>3</sup>-P<sub>3</sub>)] (**5**)**

Compound **5** crystallizes as light orange blocks from a saturated solution in *n*-hexane upon storage at -28°C. A suitable crystal with dimensions 0.08 × 0.06 × 0.05 mm<sup>3</sup> was selected and mounted on a GV50, TitanS2 diffractometer. The crystal was kept at a steady *T* = 123.01(10) K during data collection. The structure was solved with the ShelXT 2014/5 (Sheldrick, 2014) solution program. The model was refined with ShelXL 2018/3 (Sheldrick, 2015) using full matrix least squares minimisation on *F*<sup>2</sup>. The asymmetric unit contains half a molecule of **5**.

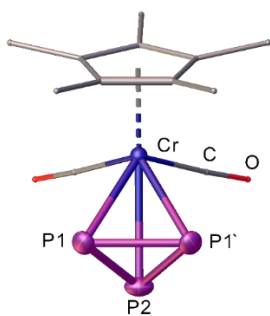**Table S6:** Selected bond lengths [*d*/Å] and angles [*α*/°] of **5**

| <i>d</i> / Å  |           | <i>α</i> / °     |            |
|---------------|-----------|------------------|------------|
| <b>Cr–P1</b>  | 2.4773(5) | <b>P1–P1'–P2</b> | 60.646(15) |
| <b>Cr–P1'</b> | 2.4773(5) | <b>P1–P2–P1'</b> | 58.71(3)   |
| <b>Cr–P2</b>  | 2.5406(7) |                  |            |
| <b>P1–P2</b>  | 2.1205(7) |                  |            |
| <b>P1–P1'</b> | 2.0790(8) |                  |            |

**Figure S10.** Molecular structure of **5** in the solid state; for reasons of clarity H atoms are omitted and the Cp\* as well as CO ligands are drawn in the wire frame model; thermal ellipsoids drawn at 50% probability level.

## References

- 
- [1] a) R. B. King, *J. Organomet. Chem.* **1967**, *8*, 139-148; b) P. Leoni, A. Landi, M. Pasquali, *J. Organomet. Chem.* **1987**, *321*, 365-369; c) T. J. Jaeger, M. C. Baird, *Organometallics* **1988**, *7*, 2074-2076; d) C. Schwarzmaier, A. Y. Timoshkin, G. Balázs, M. Scheer, *Angew. Chem. Int. Ed.* **2014**, *53*, 9077-9081.
- [2] R. B. King, A. Frozalia, *Inorg. Chem.* **1966**, *5*, 1837.
- [3] TopSpin 3.0, Bruker BioSpin GmbH
- [4] R. C. Clark, J. S. Reid, *Acta Cryst.* **1995**, *A51*, 887-897.
- [5] CrysAlisPRO, Oxford Diffraction /Agilent Technologies UK Ltd, Yarnton, England.
- [6] a) O. V. Dolomanov, L. J. Bourhis, R. J. Gildea, L. A. K. Howard, H. Puschmann, *J. Appl. Cryst.* **2009**, *42*, 339-341; b) G. Sheldrick, *Acta Cryst.* **2008**, *A64*, 112-122.
- [7] a) F. Furche, R. Ahlrichs, C. Hättig, W. Klopper, M. Sierka, F. Weigend, *WIREs Comput. Mol. Sci.* **2014**, *4*, 91-100; b) R. Ahlrichs, M. Bär, M. Häser, H. Horn, C. Kölmel, *Chem. Phys. Lett.* **1989**, *162*, 165-169; c) O. Treutler, R. Ahlrichs, *J. Chem. Phys.* **1995**, *102*, 346-354.
- [8] a) K. Eichkorn, O. Treutler, H. Oehm, M. Häser, R. Ahlrichs, *Chem. Phys. Lett.* **1995**, *242*, 652-660; b) K. Eichkorn, F. Weigend, O. Treutler, R. Ahlrichs, *Theor. Chem. Acc.* **1997**, *97*, 119.
- [9] a) P. A. M. Dirac *Proc. Royal Soc. A*, **1929**, *123*, 714-733.; b) J. C. Slater *Phys. Rev.*, **1951**, *81*, 385-390; c) S. Vosko; L. Wilk; M. Nusair, *Can. J. Phys.*, **1980**, *58*, 1200-1211; d) A. D. Becke *Phys. Rev. A*, **1988**, *38*, 3098-3100; e) J. P. Perdew. *Phys. Rev. B*, **1986**, *33*, 8822-8824.
- [10] a) A. Schäfer, C. Huber, R. Ahlrichs, *J. Chem. Phys.* **1994**, *100*, 5829; b) K. Eichkorn, F. Weigend, O. Treutler, R. Ahlrichs, *Theor. Chem. Acc.* **1997**, *97*, 119; c) F. Weigend, R. Ahlrichs, *Phys. Chem. Chem. Phys.* **2005**, *7*, 3297; d) F. Weigend, *Phys. Chem. Chem. Phys.* **2006**, *8*, 1057.
- [11] M. Sierka, A. Hogeckamp, R. Ahlrichs, *J. Chem. Phys.* **2003**, *118*, 9136.
- [12] CrysAlisPro Software System, Rigaku Oxford Diffraction, (2018).
- [13] a) L. J. Bourhis, O. V. Dolomanov, R. J. Gildea, J. A. K. Howard, H. Puschmann, The Anatomy of a Comprehensive Constrained, Restrained, Refinement Program for the Modern Computing Environment - **Olex2** Disected, *Acta Cryst. A* **2015**, *A71*, 59-71; b) O. V. Dolomanov, L. J. Bourhis, R. J. Gildea, J. A. K. Howard, H. Puschmann, Olex2: A complete structure solution, refinement and analysis program, *J. Appl. Cryst.* **2009**, *42*, 339-341.
- [14] G. M. Sheldrick, ShelXT-Integrated space-group and crystal-structure determination, *Acta Cryst.* **2015**, *A71*, 3-8.
- [15] G. M. Sheldrick, Crystal structure refinement with ShelXL, *Acta Cryst.* **2015**, *C71*, 3-8.
